# Supplementary material
Source: ML conference proceedings conference paper supplement (https://proceedings.neurips.cc/paper_files/paper/2022/hash/649f080d8891ab4d4b262cb9cd52e69a-Abstract.html)
Supplement: Supplementary file 1 [file 649f080d8891ab4d4b262cb9cd52e69a-Supplemental-Conference.zip]

Archive with 4 entries (4 files):
- appendix.pdf
- __MACOSX/._appendix.pdf
- codes.zip
- __MACOSX/._codes.zip
